# Supplementary material for: Outcomes in Ixekizumab Patients Following Exposure to Secukinumab and Other Biologics in the CorEvitas Psoriasis Registry
Source: Springer Nature journal article supplement (doi:10.1007/s13555-022-00834-7), 2022-11-04
Supplement: MOESM1 [file 23675842]

Outcomes in ixekizumab patients following exposure to secukinumab and other biologics in the  
CorEvitas Psoriasis Registry

Benjamin Lockshin, MD<sup>1</sup>, Ryan W. Harrison, MS<sup>2</sup>, Robert R. McLean DSc, MPH<sup>2</sup>, Margaux M. Crabtree,  
MPH<sup>2</sup>, Bruce W. Konicek, MS<sup>3</sup>, Baojin Zhu, PhD<sup>3</sup>, William N. Malatestinic, PharmD, MBA<sup>3</sup>, Bilal Atiya,  
PharmD<sup>3</sup>, Mwangi J. Murage, PhD, MPH<sup>3</sup>, Russel Burge, PhD<sup>3</sup>

<sup>1</sup>US Dermatology Partners, Rockville, MD, USA; <sup>2</sup>CorEvitas, LLC, Waltham, MA, USA; <sup>3</sup>Eli Lilly and  
Company, Indianapolis, IN, USA

Corresponding Author:

Benjamin Lockshin, MD  
US Dermatology Partners  
15245 Shady Grove Road, Suite 480  
Rockville, MD 20850  
(301) 681-7397  
blockshin@dermassociates.com

**Supplemental Table 1. Estimated Percent Achievement**

| Outcome | Unadjusted        |                   | Adjusted*         |                   |
|---------|-------------------|-------------------|-------------------|-------------------|
|         | SEC               | OTH BIO           | SEC               | OTH BIO           |
|         | % (95% CI)        | % (95% CI)        | % (95% CI)        | % (95% CI)        |
| PASI75  | 44.1 (36.5, 53.3) | 55.4 (49.9, 61.6) | 36.0 (26.4, 49.2) | 46.2 (34.1, 62.6) |
| PASI90  | 25.0 (18.7, 33.4) | 39.6 (34.2, 45.8) | 22.7 (14.0, 36.8) | 35.2 (22.3, 55.8) |
| PASI100 | 14.7 (9.8, 22.0)  | 30.6 (25.6, 36.5) | 13.4 (6.9, 26.2)  | 28.2 (14.8, 53.8) |
| IGA ≤ 1 | 37.1 (29.7, 46.3) | 53.8 (48.1, 60.3) | 43.1 (30.7, 60.5) | 60.3 (44.0, 82.6) |

Covariates are held at their respective means for continuous variables, or at representative values for categorical variables (race = White, PsA (psoriatic arthritis) = None, gender = Male, line of therapy = 1 prior biologic); 95% confidence intervals (CI) are prediction intervals for an individual; IGA, Investigator's Global Assessment; \*Adjusted for age, gender, race, disease duration, psoriatic arthritis, line of therapy, and baseline outcome value
